# Supplementary material
Source: MDPI journal article supplement (https://www.mdpi.com/2673-8007/4/2/46)
Supplement: s1 [file s1]

Table S1. Overview of bacterial bioprospection. Colonies obtained and strains isolated

| Colony   | Halo chromium reduction on solid medium (mg/L) |                |    |    |     | New strain code |
|----------|------------------------------------------------|----------------|----|----|-----|-----------------|
|          | 15                                             | 25             | 50 | 75 | 100 |                 |
| LB01     | +                                              | +              | +  | -  | -   | QRePLB01        |
| LB02     | +                                              | +              | -  | -  | -   | QRePLB02        |
| LB03     | +                                              | -              | -  | -  | -   | -               |
| LB04     | g <sup>-</sup>                                 | -              | -  | -  | -   | -               |
| LB13     | g <sup>-</sup>                                 | g <sup>-</sup> | -  | -  | -   | QRePLB13        |
| LB14G2   | +                                              | -              | -  | -  | -   | -               |
| LB17G2   | +                                              | +              | +  | -  | -   | -               |
| LB0197G4 | +                                              | +              | +  | -  | -   | -               |
| LB0198G3 | +                                              | +              | +  | -  | -   | -               |
| LB22     | +                                              | -              | -  | -  | -   | -               |
| LB22R    | +                                              | -              | -  | -  | -   | -               |
| LB31     | +                                              | -              | -  | -  | -   | -               |
| LB33     | +                                              | +              | +  | -  | -   | QRePLB33        |
| 33AC*    | ND                                             | +              | +  | +  | +   | QReMLB33A       |
| 33BB*    | ND                                             | ND             | ND | ND | ND  | QReMLB33D       |
| 33CB*    | ND                                             | ND             | ND | ND | ND  | QReMLB33C       |
| 33CC*    | ND                                             | ND             | ND | ND | ND  | -               |
| LB39     | g <sup>-</sup>                                 | -              | -  | -  | -   | -               |
| LB53RG3  | +                                              | +              | +  | -  | -   | -               |
| LB63     | +                                              | +              | -  | -  | -   | -               |
| LB72G2   | +                                              | +              | +  | -  | -   | -               |
| LB77     | +                                              | -              | -  | -  | -   | -               |
| LB00E    | ND                                             | ND             | ND | ND | ND  | QRePLB00E       |
| LBC3-1   | ND                                             | ND             | ND | ND | ND  | QRePLBC31       |
| LBC3-4   | ND                                             | ND             | ND | ND | ND  | QRePLBC34       |
| NB14G3   | +                                              | +              | +  | -  | -   | -               |
| NB21     | +                                              | -              | -  | -  | -   | QRePNB21        |
| NB22     | +                                              | -              | -  | -  | -   | -               |
| NB24     | +                                              | +              | +  | -  | -   | -               |
| NB25G3   | +                                              | +              | +  | -  | -   | -               |
| NB25RG3  | +                                              | +              | +  | -  | -   | -               |
| NB26     | +                                              | -              | -  | -  | -   | -               |
| NB43     | +                                              | -              | -  | -  | -   | -               |
| NB47     | +                                              | -              | -  | -  | -   | -               |
| NB53     | +                                              | -              | -  | -  | -   | -               |
| NB53G4   | +                                              | +              | +  | +  | -   | QRePNB53        |
| R2A29    | +                                              | +              | -  | -  | -   | -               |
| R2A30    | +                                              | +              | -  | -  | -   | -               |
| R2A31    | +                                              | +              | -  | -  | -   | QRePRA31        |
| R2A44    | +                                              | +              | +  | +  | -   | -               |
| R2A54    | +                                              | -              | -  | -  | -   | -               |
| R2A55    | +                                              | +              | +  | +  | -   | QRePRA55        |
| R2A56    | +                                              | +              | -  | -  | -   | -               |
| R2A57    | +                                              | +              | -  | -  | -   | -               |
| 44CC**   | ND                                             | ND             | ND | ND | ND  | QReMLB44C       |
| 55A***   | ND                                             | +              | +  | +  | +   | QReMLB55A       |
| 55B***   | ND                                             | ND             | ND | ND | ND  | QReMLB55B       |

Classification of Cr(VI) reduction according to the halo formed with ortho-dianisidine: (g-) growth was observed but not the reduction's halo.

(-) halo was not observed; (+) reduction halo observed; (ND) No determined.

Colonies from the other colonies: (\*) from LB33, (\*\*) from R2A44, (\*\*\*) From R2A55
